# Supplementary material
Source: PubMed Central journal article supplement (PMC5296292)
Supplement: NIHMS821010-supplement-supplement_1.pdf [file NIHMS821010-supplement-supplement_1.pdf]

1  
2  
3 cells before (A, B) or after 7 (C, D) and 14 (E, F) days of chondrogenic differentiaton  
4 in the absence (Veh, A, C, E) or the presence of 20 nM rapamycin (Rapa, B, D,  
5 F).Scale bar: 1 mm. (G) qPCR analyses of *Acan*, *Col2a1*, and *Sox9* expression in  
6 ATDC5 cells before **chondrogenic induction (-IM)** or after 7 days of culture in  
7 chondrogenic media (IM) supplemented without (**IM+DMSO**) or with 20 nM  
8 rapamycin (IM+Rapa). n=3, \*:  $P<0.05$ .  
9  
10  
11  
12  
13  
14  
15  
16  
17

18 **Supplemental Figure 1.** Western blot analysis of protein samples isolated from  
19 DMSO- or 20 nM rapamycin-treated ATDC5 cells. ATDC5 cells were subjected to  
20 DMSO or rapamycin treatment for 18 hours prior to protein isolation.  
21  
22  
23

24 **Supplemental Figure 2.** Enlarged images of H&E staining on paraffin sections of  
25 humerus from E12.5 wild-type (Ctrl) and RapCKO (F) embryos. Scale bar: 1  $\mu\text{m}$ .  
26  
27  
28

29 **Supplemental Figure 3.** Lower magnification images of Alcian blue staining of  
30 ATDC5 cells before (A, B) or after 7 (C, D) and 14 (E, F) days of chondrogenic  
31 differentiaton in the absence (Veh, A, C, E) or the presence of 20 nM rapamycin  
32 (Rapa, B, D, F).Scale bar: 4 mm.  
33  
34  
35  
36  
37  
38  
39

40 **Supplemental Figure 4.** Effects of rapamycin treatment on cell proliferation. ATDC5  
41 cells were seeded in 6-well plates at  $2 \times 10^5$  cells/well. After overnight culture, cells  
42 were treated with either DMSO (Veh) or 20 nM rapamycin. Cell numbers were  
43 counted after 1 day and 2 days of rapamycin treatment using a hemacytometer.  
44  
45  
46  
47  
48  
49  
50  
51  
52  
53  
54  
55  
56  
57  
58  
59  
60

1  
2  
3  
4  
5  
6  
7  
8  
9  
10  
11  
12  
13  
14  
15  
16  
17  
18  
19  
20  
21  
22  
23  
24  
25  
26  
27  
28  
29  
30  
31  
32  
33  
34  
35  
36  
37  
38  
39  
40  
41  
42  
43  
44  
45  
46  
47  
48  
49  
50  
51  
52  
53  
54  
55  
56  
57  
58  
59  
60

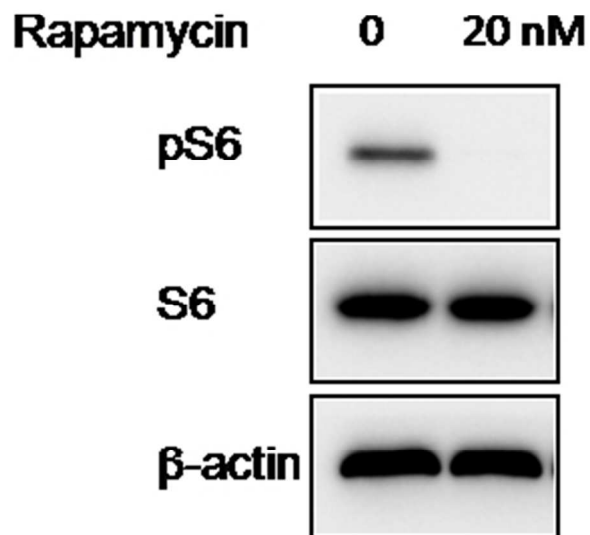

Supplemental Figure 1  
92x95mm (96 x 96 DPI)

review

1  
2  
3  
4  
5  
6  
7  
8  
9  
10  
11  
12  
13  
14  
15  
16  
17  
18  
19  
20  
21  
22  
23  
24  
25  
26  
27  
28  
29  
30  
31  
32  
33  
34  
35  
36  
37  
38  
39  
40  
41  
42  
43  
44  
45  
46  
47  
48  
49  
50  
51  
52  
53  
54  
55  
56  
57  
58  
59  
60

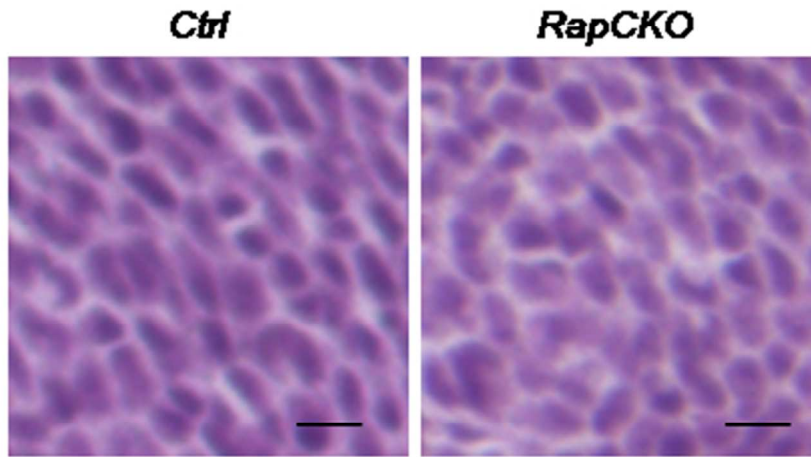

Supplemental Figure 2  
127x78mm (96 x 96 DPI)

1  
2  
3  
4  
5  
6  
7  
8  
9  
10  
11  
12  
13  
14  
15  
16  
17  
18  
19  
20  
21  
22  
23  
24  
25  
26  
27  
28  
29  
30  
31  
32  
33  
34  
35  
36  
37  
38  
39  
40  
41  
42  
43  
44  
45  
46  
47  
48  
49  
50  
51  
52  
53  
54  
55  
56  
57  
58  
59  
60

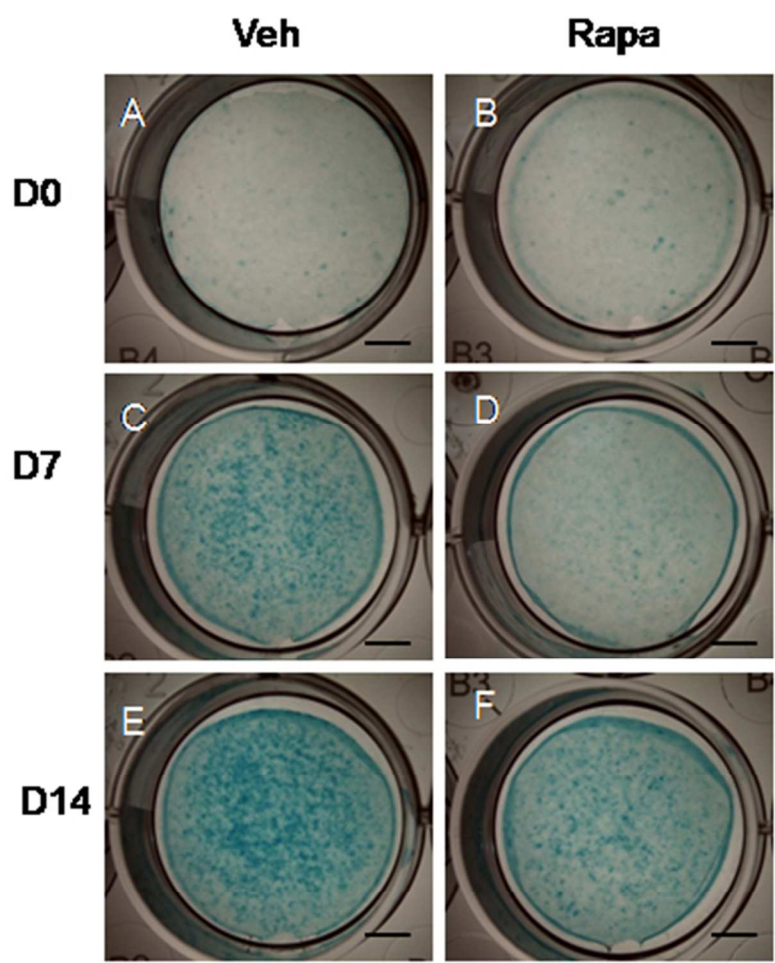

Supplemental Figure 3  
114x139mm (96 x 96 DPI)

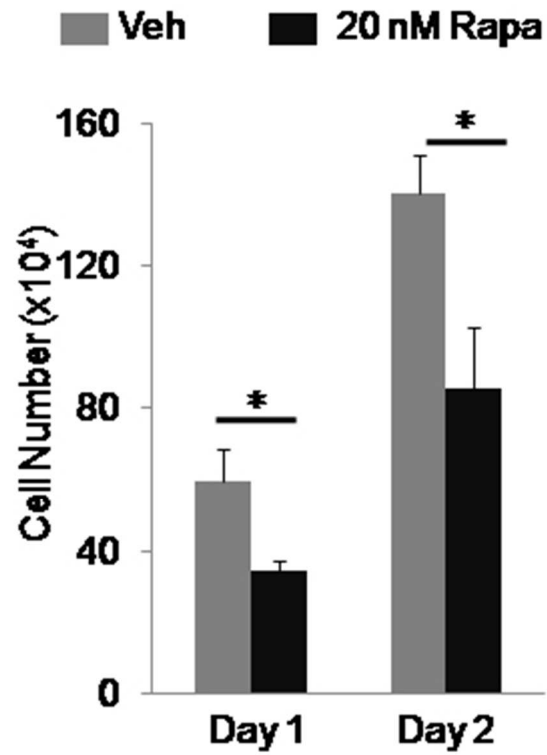

Supplemental Figure 4  
88x113mm (96 x 96 DPI)

iew
